# Supplementary figures and images for: Association of CHMP4B and Autophagy with Micronuclei: Implications for Cataract Formation
Source: Hindawi journal article supplement (doi:10.1155/2014/974393), 2014-01-01

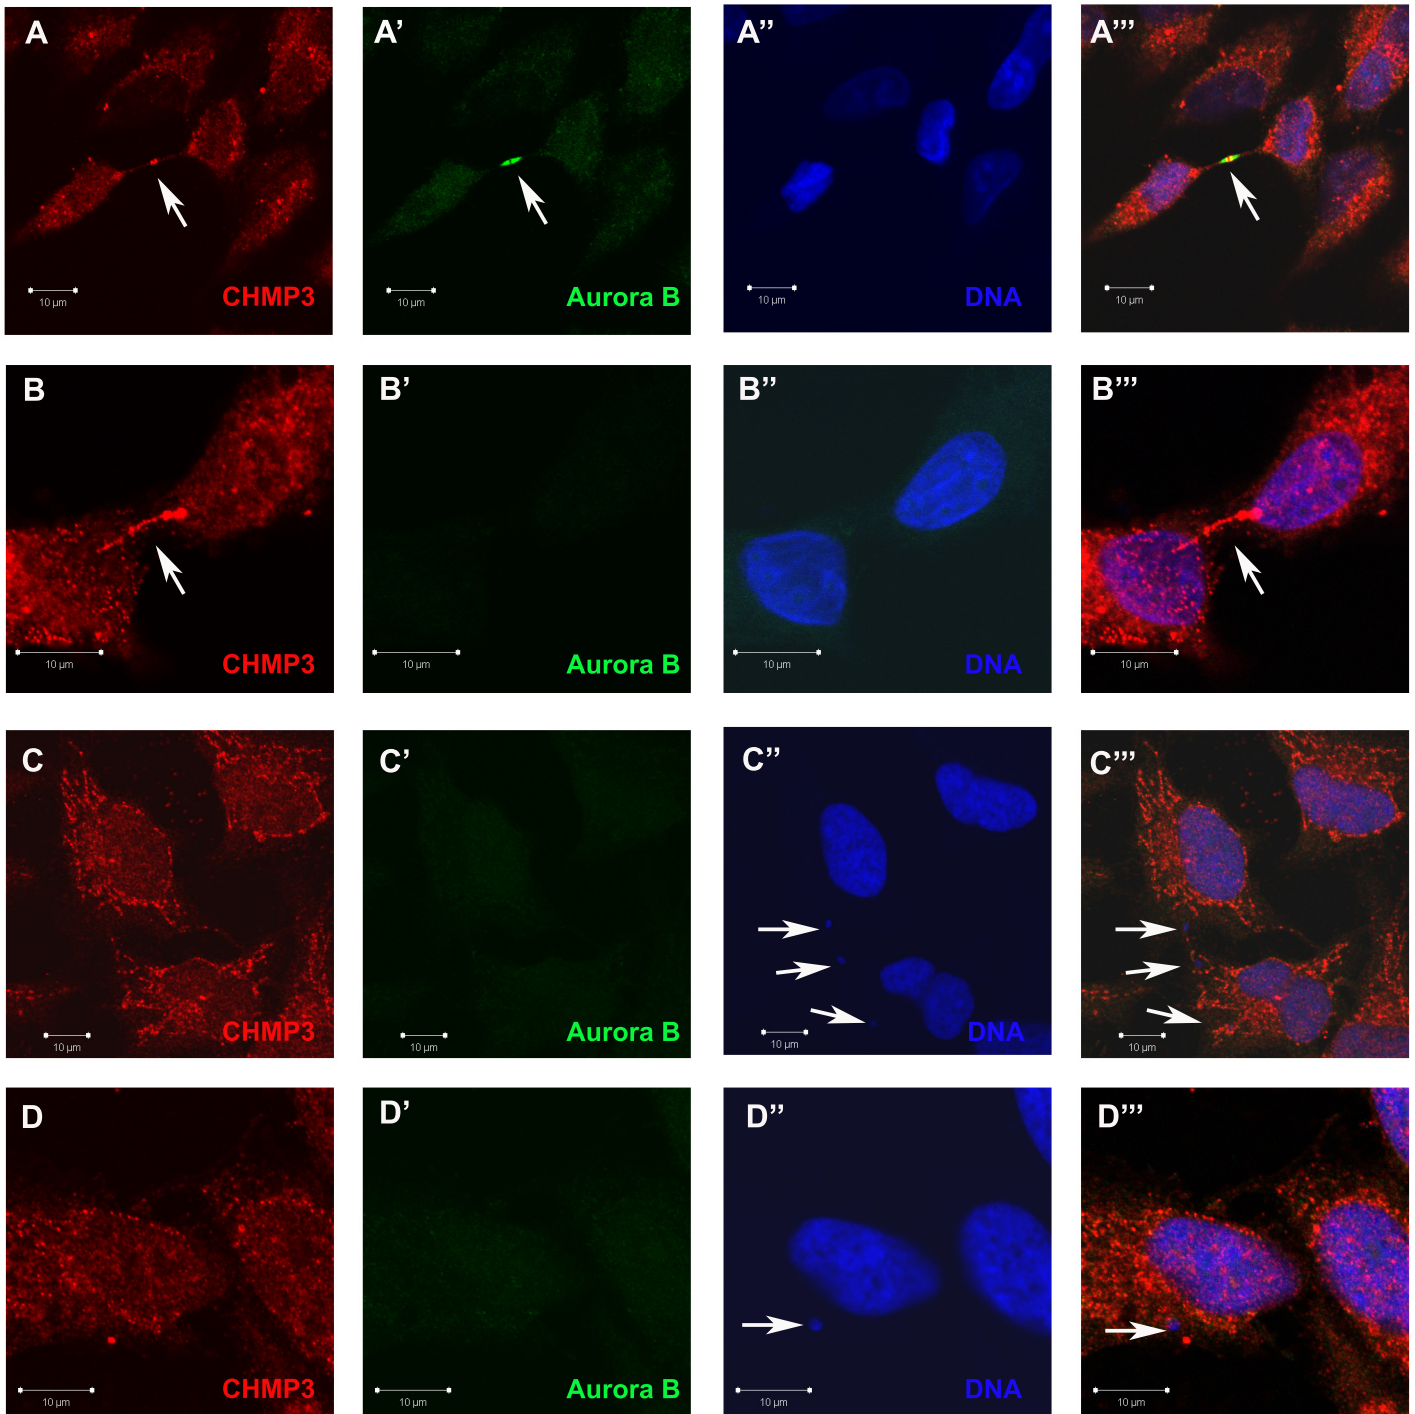

Suppl.fig.1 Sagona et al., 2011

**A**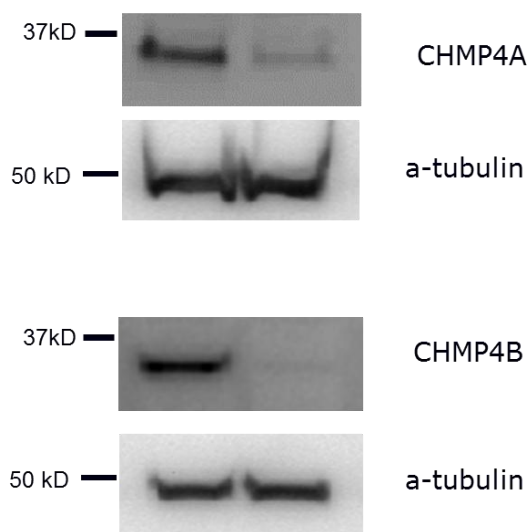**B**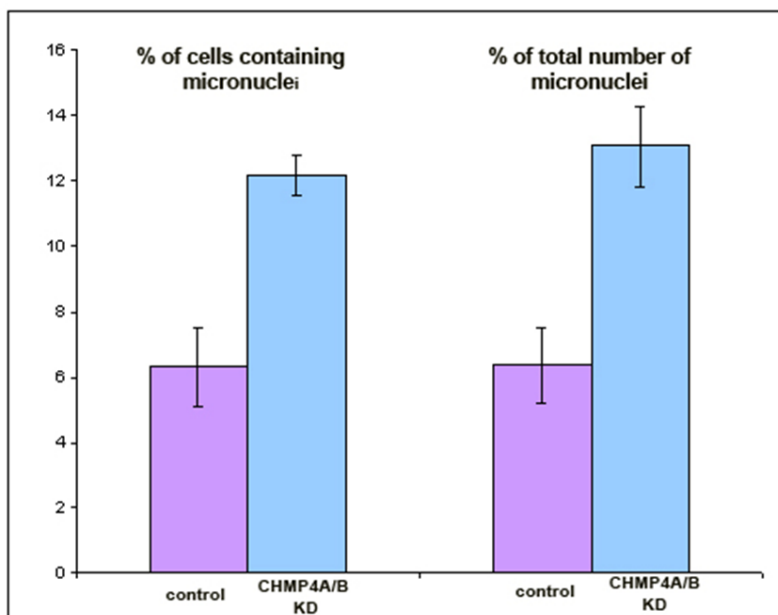**C**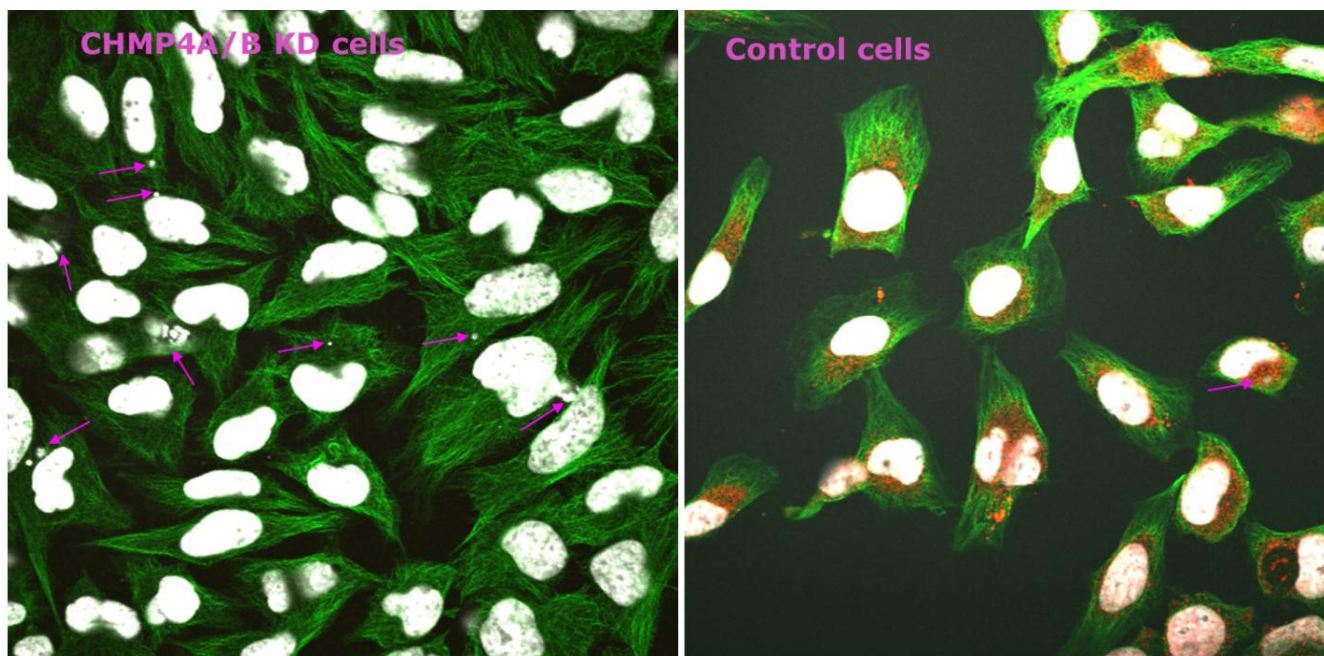

A-tubulin Hoechst CHMP4B

Supplement: f1 [file 974393.f1.zip]
